# Supplementary material for: Transcriptional landscape of epithelial and immune cell populations revealed through FACS-seq of healthy human skin
Source: PubMed Central journal article supplement (PMC5430950; doi:10.1038/s41598-017-01468-y), 2017-05-02

**Supplementary Information for "Transcriptional landscape of epithelial and immune cell populations revealed through FACS-seq of healthy human skin"**

Richard S. Ahn<sup>1\*</sup>, Keyon Taravati<sup>1</sup>, Kevin Lai<sup>1</sup>, Kristina M. Lee<sup>1</sup>, Joanne Nititham<sup>1</sup>,  
Rashmi Gupta<sup>1</sup>, David S. Chang<sup>2,3</sup>, Sarah T. Arron<sup>1</sup>, Michael Rosenblum<sup>1</sup>, Wilson Liao<sup>1</sup>

<sup>1</sup>Department of Dermatology, University of California, San Francisco, San Francisco, CA. <sup>2</sup>Department of Plastic Surgery, California Pacific Medical Center, San Francisco, CA

<sup>3</sup>Department of Surgery, University of California, San Francisco, San Francisco, CA

\*Correspondence should be addressed to Richard Ahn, PhD, Department of Dermatology, University of California, San Francisco, 2340 Sutter Street, Box 0808, San Francisco, CA 94143-0808, USA (email: richard.ahn@ucsf.edu)

Supplementary Figure 1a. FACS gating strategy for sorting out CD4+ T effectors, CD8+ T cells, and dendritic cells.

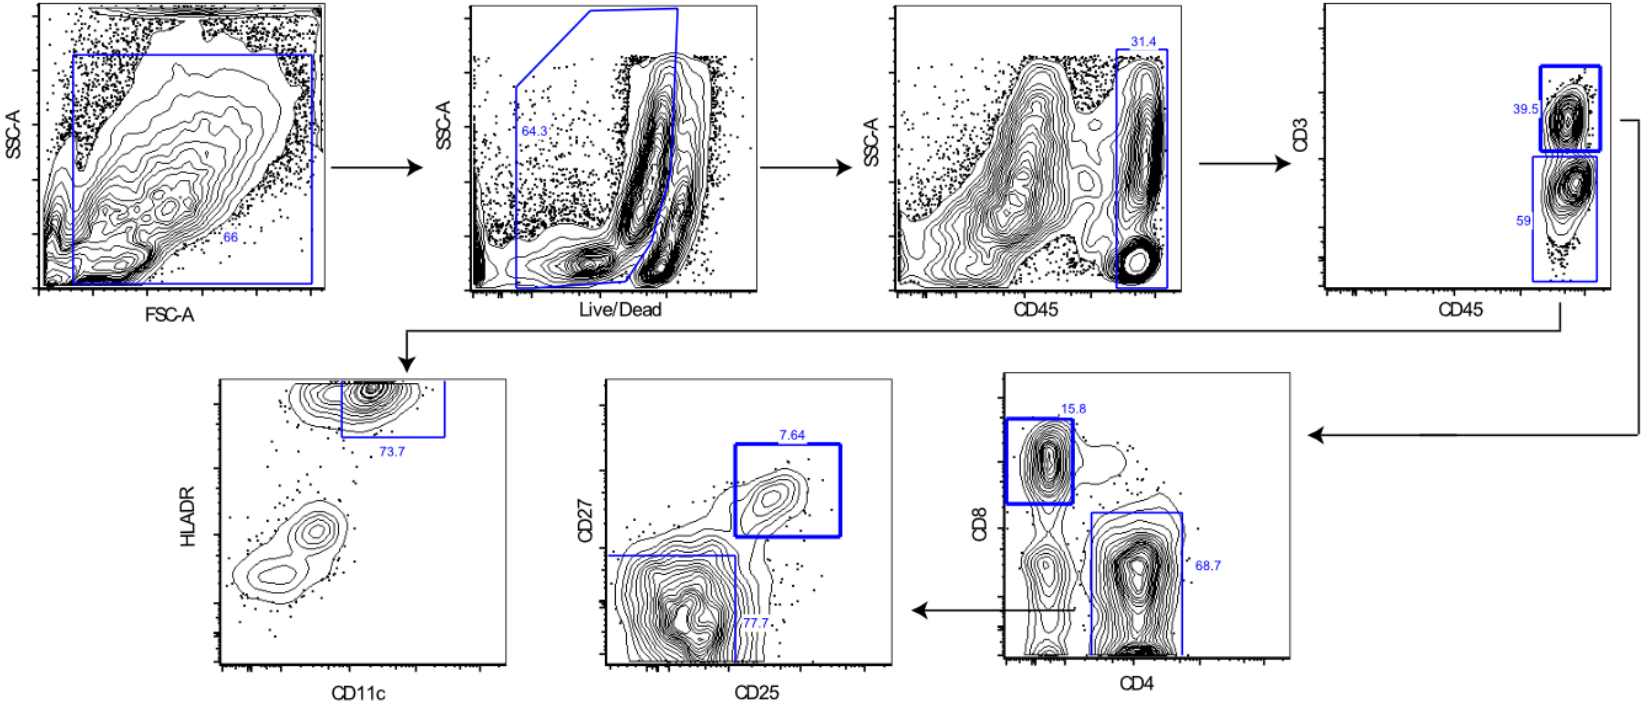

Supplementary Figure 1b. FACS gating strategy for isolating keratinocytes.

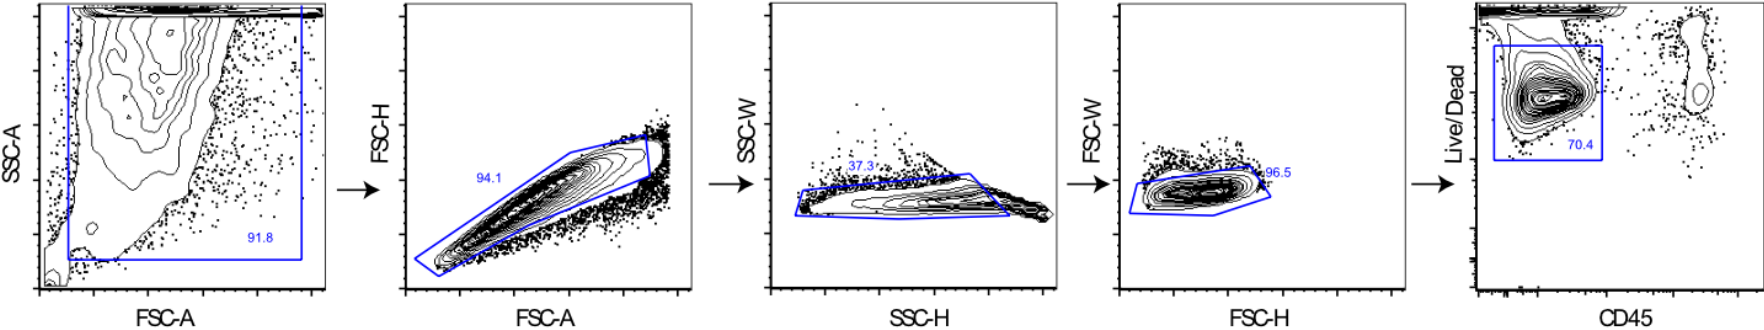

Supplement: 41598_2017_1468_MOESM1_ESM.pdf [file 41598_2017_1468_MOESM1_ESM.pdf]
